# Supplementary material for: Projected global ground-level ozone impacts on vegetation under different emission and climate scenarios
Source: Copernicus journal article supplement (doi:10.5194/acp-17-12177-2017), 2017-10-12
Supplement: Supplementary file 1 [file acp-17-12177-2017-supplement.pdf]

Supplement of Atmos. Chem. Phys., 17, 12177–12196, 2017  
<https://doi.org/10.5194/acp-17-12177-2017-supplement>  
© Author(s) 2017. This work is distributed under  
the Creative Commons Attribution 3.0 License.

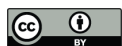

*Supplement of*

## **Projected global ground-level ozone impacts on vegetation under different emission and climate scenarios**

**Pierre Sicard et al.**

*Correspondence to:* Pierre Sicard ([pierre.sicard@acri-he.fr](mailto:pierre.sicard@acri-he.fr))

The copyright of individual parts of the supplement might differ from the CC BY 3.0 License.

## 12 ACCMIP models and RCP scenarios

13 All models simulate gaseous tropospheric chemistry, with various degrees of complexity: from 16  
14 species in CESM-CAM to 110 species in MOCAGE depending on the degree of representation of  
15 non-methane hydrocarbon (NMHCs) chemistry in their chemical scheme. The aerosol indirect  
16 effects, including interactions between aerosols and gas-phase chemistry, are represented in GFDL-  
17 AM3, GISS-E2-R and MIROC-CHEM (Table 1). For future stratospheric O<sub>3</sub> projections, the  
18 models are grouped into 2 categories: the first group includes models with interactive or semi-  
19 offline chemistry and the second group includes models with prescribed O<sub>3</sub>. Some models (e.g.  
20 GFDL-AM3, GISS-E2-R, MIROC-CHEM and MOCAGE) include full stratospheric chemistry  
21 schemes, while CESM-CAM is based on a linearized O<sub>3</sub> chemistry (i.e. LINOZ scheme, McLinden  
22 et al., 2000) and UM-CAM uses the CMIP5 dataset (Cionni et al., 2011) to prescribe offline O<sub>3</sub> in  
23 the stratosphere.

24

25 All models simulate temporal and spatial evolution of anthropogenic and natural emissions at global  
26 scale such as black carbon (BC), organic carbon (OC), secondary organic aerosols (SOA), non-  
27 methane volatile organic compounds (NMVOC), ammonia (NH<sub>3</sub>), nitrogen oxides (NO<sub>x</sub>) from soils  
28 and lightning, and carbon monoxide (CO) from oceans and vegetation (see details in Stevenson et  
29 al., 2012). Surface methane (CH<sub>4</sub>) concentrations, with spatial variation, are prescribed in all  
30 models using data from the database of Coupled Model Intercomparison Project Phase 5 (CMIP5),  
31 except for GISS-E2-R, in which interactive wetlands emissions for future are used (Shindell et al.,  
32 2012). Methane burdens vary with the time slices in all models (Tables 2). Natural biogenic  
33 emissions are those given by MEGAN v2.1 inventory, i.e. Model of Emissions of Gases and  
34 Aerosols from Nature (Guenther et al., 2012). Biogenic VOCs (e.g. isoprene) depend on  
35 meteorological conditions and may be responsible for near-surface O<sub>3</sub> changes (Guenther et al.,  
36 2006; Lin et al., 2008; Sicard et al., 2009). Only GISS-E2-R incorporates climate-driven isoprene  
37 emissions, the most abundant and reactive biogenic VOC. The other models prescribe fixed  
38 biogenic emissions, e.g. based on constant present-day isoprene emissions for all simulations.  
39 GISS-E2-R has interactive isoprene but fixed soil NO<sub>x</sub> (Lamarque et al., 2013; Young et al., 2013).  
40 Possible changes in lightning activity with climate change are recognized to impact the lightning  
41 NO<sub>x</sub> emissions (LNO<sub>x</sub>), therefore most models use the parameterization by Price and Rind (1992)  
42 based on the simulated convective activity (e.g. Fiore et al., 2006; Williams, 2009; Lamarque et al.,  
43 2013).

44

45 The three RCPs scenarios are named for their nominal radiative forcing level by 2100 (Thomson et  
46 al., 2011; San José et al., 2016). The RCP2.6 and RCP8.5 scenarios provide the boundary  
47 conditions in terms of 2100 climate change, i.e. by 2100, global mean surface air temperature at the  
48 land and ocean ranges from 1.0 to 4.5°C relative to the mean temperature over the pre-industrial  
49 period (Lamarque et al., 2013). The rise in global mean surface temperature by the end of the 21<sup>st</sup>  
50 century is in the ranges 2.6-4.8°C (RCP8.5), 1.1-2.6°C (RCP4.5) and 0.3-1.7°C (RCP2.6) at 68% of  
51 confidence interval. The greenhouse gas concentrations for the RCPs and their extensions beyond  
52 2100 are deeply described by Meinshausen et al. (2011).

## 53 **Results**

### 54 **Detailed description of the surface ozone concentration and AOT40 spatial pattern**

55 Figure 1 shows the mean annual O<sub>3</sub> concentration at the lower model layer (Table 1) while Figure 2  
56 shows the AOT40 distribution from the ACCMIP models for the historical and RCPs simulations.

57

58 In **CESM-CAM**, the historical highest surface O<sub>3</sub> mean concentrations (35-55 ppb) and AOT40  
59 (>30 ppm.h) are observed in the Northern Hemisphere (NH), in particular over Greenland, Canada,  
60 Alaska, Mediterranean basin, East Asia and Tibetan plateau (>50 ppb and 60 ppm.h, respectively).  
61 The lowest O<sub>3</sub> mean concentrations (15-30 ppb) and AOT40 (<10 ppm.h) are recorded in particular  
62 below latitude 15°N and in the Southern Hemisphere (SH). Under RCP2.6 scenario, the surface O<sub>3</sub>  
63 mean concentrations decrease worldwide with mean concentrations of 25-30 ppb above latitude  
64 15°N, except over the Tibetan plateau (around 40 ppb) and of 10-20 ppb below latitude 15°N. The  
65 AOT40 values are lower than 10 ppm.h worldwide (Fig. 2). Under RCP8.5, the O<sub>3</sub> mean  
66 concentrations increase up to 50 ppb above latitude 15°N and reach 65 ppb over the Tibetan plateau.  
67 The AOT40 values increase from 20 to 60 ppm.h in the latitude band 15-45°N in the Western  
68 Hemisphere (WH) and the highest increases occur in Northwestern America, Greenland,  
69 Mediterranean basin, Near East and East Asia. The highest AOT40 values (>70 ppm.h) are found  
70 over the Tibetan plateau, Greenland and Near East.

71

72 In **GFDL-AM3**, a larger extent of high surface O<sub>3</sub> mean concentrations (>40ppb) is observed, i.e.  
73 covering North and Central America, Europe, Near East, Africa and Asia (Fig. 1). The highest O<sub>3</sub>  
74 levels (>50 ppb) are simulated in high-elevation areas (Rocky, Appalachian and Himalaya  
75 Mountains and Tibetan plateau) and over deserts (Near East, Colorado, Nevada and Gobi). The  
76 highest AOT40 values (>70 ppm.h) are observed in the latitude band 15-45°N (e.g. over Greenland  
77 and Tibetan plateau, East U.S, Near East). The lowest surface O<sub>3</sub> mean concentrations (<30 ppb)

78 and AOT40 (<10 ppm.h) are observed in South America, Oceania and Indonesia. Under RCP2.6,  
79 the global O<sub>3</sub> mean concentration is around 30 ppb, except in West and Equatorial Africa and South  
80 Asia (>40 ppb). A slighter decrease is observed in South America, Oceania and Indonesia where  
81 low historical O<sub>3</sub> mean levels (<30 ppb) are recorded. The AOT40 values are below 10 ppm.h  
82 worldwide, except in West and Equatorial Africa and South Asia (>70 ppm.h). Under RCP4.5, the  
83 O<sub>3</sub> mean concentrations range from 30 to 45 ppb, except in Northern South America and Indonesia  
84 (<20 ppb) and over the Tibetan plateau (>50 ppb). The AOT40 values exceed 30 ppm.h in Alaska,  
85 Greenland, East Asia and exceed 70 ppm.h over the Tibetan plateau and in Africa. The O<sub>3</sub> mean  
86 concentrations reach 50-60 ppb worldwide under RCP8.5, except in South America, Oceania and  
87 Indonesia (<35 ppb). The highest increases are observed in NH, in particular in Northwestern  
88 America, Greenland, Near East and South Asia (>65 ppb). The highest AOT40 values (>70 ppm.h)  
89 are found in Northern America, Greenland, in the latitude band 15-45°N in WH, in Equatorial and  
90 South Africa. Only South America and Oceania have AOT40 <10 ppm.h.

91

92 In **GISS-E2-R**, the highest historical surface O<sub>3</sub> mean concentrations (>40 ppb) and AOT40 (>70  
93 ppm.h) are observed in NH above latitude 30°N (e.g. Greenland, Tibetan plateau, Eastern U.S.,  
94 Mediterranean basin) and in the well-industrialized areas, close to Beijing and Los Angeles (>60  
95 ppb). The lowest O<sub>3</sub> concentrations (<15 ppb) are recorded in Amazon, African and over  
96 Indonesian rainforests as well as in Australian Western plateau (shrubland). AOT40 range from 30  
97 to 40 ppm.h in Central Europe and Asia, Siberia and North America while the lowest AOT40 (<10  
98 ppm.h) are found in SH (Fig. 2). Under RCP2.6, the strongest decreases in surface O<sub>3</sub> mean  
99 concentrations and AOT40 are simulated in NH above latitude 15°N, where high historical O<sub>3</sub>  
100 concentrations (>40 ppb) and AOT40 (>40 ppm.h) are reported. Under RCP4.5, the lowest surface  
101 O<sub>3</sub> mean concentrations (10-20 ppb) and AOT40 (<10 ppm.h) are observed below latitude 15°N.  
102 Compared to the historical mean, the O<sub>3</sub> mean concentrations are lower in Western Africa and  
103 South Asia. Under RCP8.5, the strongest increases in surface O<sub>3</sub> mean concentrations are observed  
104 in NH above latitude 15°N, in particular over Greenland and South Asia (>70 ppb). Above latitude  
105 30°N, high AOT40 values (30-60 ppm.h) occur, and exceed 70 ppm.h over Greenland, Near East,  
106 South Asia and around the Mediterranean basin. The lowest O<sub>3</sub> levels (<20 ppb) and AOT40 (<10  
107 ppm.h) are reported in South America and Oceania. The O<sub>3</sub> burden is higher in NH while no  
108 significant change is simulated in SH as compared to historical data.

109

110 In **MIROC-CHEM**, the surface O<sub>3</sub> mean concentrations follow a clear latitudinal gradient, i.e. the  
111 highest mean concentrations (40-50 ppb) are observed in the latitude band 15-45°N, the range is 30-

112 40 ppb in the latitude band 45-60°N and <20 ppb above latitude 60°N. The concentrations are <30  
113 ppb below latitude 15°N. AOT40 values, exceeding 30 ppm.h, are modelled in Eastern U.S, Central  
114 Europe and Africa, Near East and South Asia. Under RCP2.6, a homogeneous decrease is observed  
115 worldwide, i.e. above latitude 50°N, the O<sub>3</sub> mean concentrations are <20 ppb, as well as in South  
116 America, Oceania and Indonesia, and the AOT40 are <20 ppm.h worldwide. Slight changes are  
117 observed between the historical simulation and RCP8.5. The highest O<sub>3</sub> levels are simulated in Near  
118 East, Western U.S. and South Asia (45-55 ppb) while O<sub>3</sub> mean concentrations of 20-35 ppb occur  
119 worldwide. The mean AOT40 is <10 ppm.h worldwide, except in South Asia, Near East and a few  
120 locations in Africa (>65 ppm.h).

121

122 In **MOCAGE**, a heterogeneous spatial distribution of historical surface O<sub>3</sub> concentrations and  
123 AOT40 is found with a fine-scale resolution. The highest surface O<sub>3</sub> mean concentrations (>50 ppb)  
124 and AOT40 (>70 ppm.h) are observed in particular in the latitude band 15-45°N. Higher O<sub>3</sub> metrics  
125 values are simulated over Greenland, deserts (e.g. Gobi, Saudi Arabia), well-industrialized areas of  
126 North America and South Asia (e.g. Eastern U.S, Beijing) and at high-elevation sites (e.g. Summit  
127 in Greenland, Himalaya, Appalachian Mountains). The lowest concentrations (<20 ppb) are  
128 recorded in South America and Oceania while lower AOT40 (<10 ppm.h) are also observed in  
129 Northwestern America, Scandinavia, North Asia and along the African coastline. Under RCP2.6,  
130 the highest decreases in O<sub>3</sub> mean levels and AOT40 are reported where higher historical O<sub>3</sub> mean  
131 concentrations (40-60 ppb) and AOT40 (>70 ppm.h) are simulated, i.e. in the latitude band 15-45°N  
132 in WH, in North America and Greenland. Compared to the historical mean, no significant change is  
133 observed for the rest of the world. Under RCP4.5, the global O<sub>3</sub> mean levels (30-40 ppb) and  
134 AOT40 values (10-20 ppm.h) are lower than historical observations in NH, except in Canada,  
135 Greenland and East Asia where deterioration is observed compared to the historical time period. For  
136 mean concentrations and AOT40, no significant change is found in SH as compared to the historical  
137 simulation. Under RCP8.5, all the HN is strongly impacted by the increase in O<sub>3</sub> mean levels and  
138 AOT40. The highest O<sub>3</sub> mean concentrations (55-65 ppb) and AOT40 (>70 ppm.h) are observed in  
139 Greenland, Near East and across Asia.

140

141 In **UM-CAM**, the highest ground-level O<sub>3</sub> mean concentrations are simulated over deserts and  
142 remote areas (i.e. Greenland, Rocky Mountains, Sahara, Near East and Gobi), in particular in the  
143 latitude band 15-45°N with O<sub>3</sub> concentrations ranging from 40 to 60 ppb. The lowest O<sub>3</sub>  
144 concentrations (<15 ppb) are simulated over Amazon. Lower AOT40 values (<20 ppm.h) are found  
145 worldwide, except over Greenland and in latitude band 15-45°N in the Eastern Hemisphere (>30

146 ppm.h). The highest AOT40 values (>70 ppm.h) are observed in Near East and over the Tibetan  
147 plateau. Similarly to MOCAGE under RCP2.6, the highest decreases in O<sub>3</sub> mean levels and AOT40  
148 are reported where higher historical O<sub>3</sub> mean concentrations (40-60 ppb) and AOT40 (>70 ppm.h)  
149 are simulated, i.e. in the latitude band 15-45°N in WH, in North America and Greenland. Under  
150 RCP4.5, the decreases in O<sub>3</sub> mean levels and AOT40 occur, in particular, in the latitude band 15-  
151 45°N in WH and in Northwestern America. The Tibetan plateau is an O<sub>3</sub> hot-spot (>50 ppb). Under  
152 RCP8.5, as compared to historical data, the highest increase in O<sub>3</sub> mean levels (40-55 ppb) and  
153 AOT40 (>70 ppm.h) is reported in Northwestern America, Greenland and in the latitude band 15-  
154 45°N in WH, reaching 70 ppb over the Tibetan plateau. Compared to the historical mean, no  
155 significant change is observed below latitude 15°N (<30 ppb).

156

157 In summary, the highest hemispheric O<sub>3</sub> mean concentrations (30.6 ppb in SH, 42.9 ppb in NH) are  
158 observed in GFDL-AM3 while the lowest (20.4 ppb in SH, 31.4 ppb in NH) are found in MIROC-  
159 CHEM for historical simulations (Table 3a) and across all RCPs (Table 3b). Averaged over the  
160 domain, the hemispheric AOT40 means range from 0.2 ppm.h (CESM-CAM) to 4.7 ppm.h (GISS-  
161 E2-R) in SH, while higher hemispheric AOT40 means, from 9.8 ppm.h (MIROC-CHEM) to 36.8  
162 ppm.h (GISS-E2-R), are simulated in NH (Tables 3a).

163

#### 164 **Model-to-model changes in ozone burden related to emission changes**

165

166 For RCP2.6, compared to historical simulations, annual total emissions of CO, NO<sub>x</sub>, VOCs and  
167 global CH<sub>4</sub> burden decrease by 40%, 44%, 5% and 27%, respectively and LNO<sub>x</sub> increase by 7%  
168 (Table 2b). The highest reduction in overall O<sub>3</sub> concentration (-29%) is recorded in CESM-CAM  
169 (Table 3b) and related to stronger changes in total NO<sub>x</sub> (-53%) and no change in VOCs emissions.  
170 Lower reduction in O<sub>3</sub> concentrations (-13%) in MIROC-CHEM is related to a slight decrease in  
171 VOCs emissions (-7%) and to the lowest decrease in total NO<sub>x</sub> emissions (-36%).

172

173 For RCP4.5, for which data from fewer models are available, there is generally a tendency for O<sub>3</sub>  
174 precursor emissions to decrease (Table 2b). The exception is the GISS-E2-R model, where we  
175 observe an opposite tendency for CH<sub>4</sub> burden (+5%) and VOCs emissions (+7%) for RCP4.5 and a  
176 slight increase (+0.5%) in VOCs for RCP2.6.

177

178 For RCP8.5, the global O<sub>3</sub> mean concentration increases by 23% in MOCAGE and 22% in CESM-  
179 CAM and by 4% in MIROC-CHEM (Table 3b). For RCP8.5, total emissions of CO and NO<sub>x</sub> are  
180 lower by respectively 32% and 20% compared to 2000, while CH<sub>4</sub> burden has strongly increased by

181 120% on average and LNO<sub>x</sub> emissions by 33%. For RCP8.5, VOCs emissions decreased by 1.3%  
182 on average, except for GISS-E2-R. The GISS-E2-R model shows a greater degree of variation than  
183 other models, with a stronger increase in CH<sub>4</sub> burden (+153%) and in VOCs emissions (+20%) for  
184 RCP8.5. In CESM-CAM, the strongest reduction in total NO<sub>x</sub> is found (-33%) while CH<sub>4</sub> (+112%)  
185 and LNO<sub>x</sub> (+30%) emissions strongly increased, and no change in VOCs emissions are observed  
186 over time (Table 2b). In MOCAGE, the strongest increase (+24%) in O<sub>3</sub> inputs is found (Table 3b).  
187 In MIROC-CHEM, VOCs (-3%) and NO<sub>x</sub> (-7%) emissions slightly decrease while an upward trend  
188 in CH<sub>4</sub> emissions (+116%) is simulated between 2100 and the early 2000s (Table 2b).

189

190 The decreases in AOT40, averaged over the whole domain, range from -97% in CESM-CAM to -  
191 54% in MOCAGE under RCP2.6 (Table 3c). Noting that MOCAGE and UM-CAM simulate an  
192 increase in AOT40 values in SH under RCP2.6 (+69 % and +92%) and RCP4.5 (+203% and +8%)  
193 scenarios. Under RCP8.5, an increase in averaged AOT40 is simulated in all models for both  
194 hemispheres (Table 3c), from +20% (MIROC-CHEM) to +138% (CESM-CAM).

195

### 196 **Potential ozone impact on photosynthetic carbon assimilation under RCPs**

197 Figure 3 shows the percentage of variation of IO<sub>3</sub>, i.e. the change in the potential impact of O<sub>3</sub> on  
198 vegetation for the ACCMIP models computed comparing the RCPs simulations with historical runs.

199

200 In **CESM-CAM**, compared to the historical mean, IO<sub>3</sub> is homogenous worldwide under RCP2.6  
201 with a strong decrease (more than -80%) above latitude 15°N and no significant change in  
202 Southeastern U.S., Central Asia and regions where AOT40 and O<sub>3</sub> mean concentrations are the  
203 lowest, i.e. South America, Africa and Australia in SH. Under RCP8.5, a strong increase in IO<sub>3</sub>  
204 (more than +80 %) is simulated worldwide, except over Australia where no change is observed.

205

206 In **GFDL-AM3**, IO<sub>3</sub> strongly decreases (more than -80%) in NH, except in South Asia (between -10  
207 and -50%) under RCP2.6. Under RCP4.5, IO<sub>3</sub> ranges from -15 to +15% above latitude 50°N, in  
208 South and Northeastern Asia, over Amazon and South Africa. The strongest percentages of change  
209 are observed in Equatorial Africa. IO<sub>3</sub> is lower than -80% in the rest of the world (U.S., Europe,  
210 Central and Southeastern Asia). A larger extent of high IO<sub>3</sub> percentage (>+60 %) is found under  
211 RCP8.5 worldwide. However, lower increases (around +15%) are simulated in Southern Europe,  
212 Southeastern Asia and Central Africa while slight decreases (around -15 %) are observed over  
213 Amazon rainforests and in Eastern U.S. and China.

214

215 In **GISS-E2-R**, IO<sub>3</sub> strongly decreases (more than -80%) in NH, except in South Asia (between -10  
216 and -50%) under RCP2.6. Under RCP4.5, IO<sub>3</sub> exceeds -80% in NH except in South Asia. No  
217 change occurs in South America and Australia while an increase in IO<sub>3</sub> (>30%) is observed in  
218 Equatorial Africa. Under RCP8.5, the highest increase in IO<sub>3</sub> (>+60%) is simulated across Africa,  
219 in Southeastern Asia and in Southwestern U.S. close to Los Angeles where O<sub>3</sub> mean concentrations  
220 exceeding 60 ppb are recorded. Lower increases (around +15 %) are simulated over Northwestern  
221 U.S. and in central and Northeastern Asia while a reduction in GPP is observed in Europe, East  
222 china and Eastern U.S (up to -70 %).

223

224 In **MIROC-CHEM**, no change in IO<sub>3</sub> is observed worldwide except in South Asia and Equatorial  
225 Africa under RCP2.6. A strong decrease in IO<sub>3</sub> is found under RCP4.5 in Eastern U.S, Central  
226 Europe and Southeastern China, close to Beijing surroundings. An increase of IO<sub>3</sub> is simulated in  
227 Northern U.S., in South America, Asia and Africa.

228

229 In **MOCAGE**, the strongest decrease (more than -80%) under RCP2.6 occurs in Europe, East Asia  
230 and U.S., while a slight decrease or increase (between -15 and +15%) is found in Northern  
231 America, Southern and Northern Asia. Under RCP4.5, IO<sub>3</sub> strongly increases (>+60%) above  
232 latitude 50°N. Across Africa, IO<sub>3</sub> ranges from -15% to +60% over the rainforests. Slight decreases  
233 in IO<sub>3</sub> (around -15%) are observed in Europe and South America (no change) while the strongest  
234 decrease (more than -60%) are found in Southern U.S., Southeastern Asia, South America. Under  
235 RCP8.5, the increase in IO<sub>3</sub> is high worldwide, exceeding +80% above latitude 45°N, except in  
236 Central Europe where a slight decrease in IO<sub>3</sub> (-15 %) is simulated. A reduction in IO<sub>3</sub> (around -60  
237 %) is found in Eastern U.S., Southeastern China and over the Amazon rainforests.

238

239 In **UM-CAM**, the strongest decrease in IO<sub>3</sub> occurs in the latitude band 15-50°N in WH and  
240 Northwestern America under RCP2.6. No change in IO<sub>3</sub> is found over latitude 50°N and in South  
241 America, Southeastern U.S. and Australia. Under RCP4.5, decreases in IO<sub>3</sub> or no change (e.g.  
242 South America, Australia) occur worldwide, except in Africa where a few hot-spots (>+60%) are  
243 simulated. Slight increase in IO<sub>3</sub> (around +15 %) is simulated in Europe and Central Asia under  
244 RCP8.5 and the increase in IO<sub>3</sub> is high, exceeding +80%, above latitude 45°N, except in Central  
245 Europe where a slight decrease in IO<sub>3</sub> (-15 %) is simulated.

246

247 In summary, averaged over the Globe, the highest decrease in the potential O<sub>3</sub> impact for  
248 vegetation, or risk factor IO<sub>3</sub>, is observed in CESM-CAM (-97%) while the lowest (-41%) is found



249 in MIROC-CHEM under RCP2.6 (Tables 3d). For RCP8.5, strong increases in IO3 are found for all  
250 models and both hemispheres, from +21% (GISS-E2-R) to +130% (CESM-CAM). For all models,  
251 generally a reduction in IO3 is simulated over Amazon rainforests (except in CESM-CAM), Central  
252 Africa, Europe and East Asia, in particular under RCP8.5.

253 **Bibliographic references**

- 254 **Cionni I.**, Eyring V., Lamarque J.F., Randel W.J., Stevenson D.S., et al., 2011, “Ozone database in  
255 support of CMIP5 simulations: results and corresponding radiative forcing”. *Atmos. Chem.*  
256 *Phys.*11: 11267-11292.
- 257 **Fiore A.M.**, Horowitz L.W., Dlugokencky E.J., West J.J., 2006, “Impact of meteorology and  
258 emissions on methane trends, 1990-2004”. *Geophys. Res. Lett.* 33: L12809.
- 259 **Guenther A.B.**, Jiang X., Heald C.L., Sakulyanontvittaya T., Duhl T., et al., 2012, “The Model of  
260 Emissions of Gases and Aerosols from Nature version 2.1 (MEGAN 2.1): an extended and updated  
261 framework for modeling biogenic emissions”. *Geoscientific Model Development* 5: 1471-1492.
- 262 **Guenther A.B.**, Karl T., Harley P., Wiedinmyer C., Palmer P.I., Geron C., 2006, “Estimates of  
263 global terrestrial isoprene emissions using MEGAN (Model of Emissions of Gases and Aerosols  
264 from Nature)”. *Atmos. Chem. Phys.* 6: 3181-3210.
- 265 **Lamarque J.F.**, Shindell D.T., Josse B., Young P.J., Cionni I., et al., 2013, “The Atmospheric  
266 Chemistry and Climate Model Intercomparison Project (ACCMIP): overview and description of  
267 models, simulations and climate diagnostics”. *Geosci. Model Dev.* 6: 179-206.
- 268 **Lin W.**, Xu X., Zhang X., Tang J., 2008, “Contributions of pollutants from North China Plain to  
269 surface ozone at the Shangdianzi GAW Station”. *Atmos. Chem. Phys.* 8: 5889-5898.
- 270 **McLinden C.A.**, Olsen S., Hannegan B., Wild O., Prather M.J., et al., 2000, “Stratospheric ozone  
271 in 3-D models: A simple chemistry and the cross-tropopause flux”. *J. Geophys. Res.* 105: 14653-  
272 14665.
- 273 **Meinshausen M.**, Smith S.J., Calvin K., Daniel J.S., Kainuma M.L.T., 2011, “The RCP greenhouse  
274 gas concentrations and their extension from 1765 to 2300”. *Climatic Change*: 109, 213-241.
- 275 **San José R.**, Pérez J.L., González R.M., Pecci J., Garzón A., Palacios M., 2016, “Impacts of the 4.5  
276 and 8.5 RCP global climate scenarios on urban meteorology and air quality: Application to Madrid,  
277 Antwerp, Milan, Helsinki and London”. *Journal of Computational and Applied Mathematics* 293:  
278 192-207.
- 279 **Shindell D.T.**, Lamarque J.F., Schulz M., Flanner M., Jiao C., et al., 2012, “Radiative forcing in the  
280 ACCMIP historical and future climate simulations”. *Atmos. Chem. Phys. Discuss.* 12: 21105-21210.
- 281 **Sicard P.**, Coddeville P., Galloo J.C., 2009, “Near-surface ozone levels and trends at rural stations  
282 in France over the 1995-2003 period”. *Environ. Monit. Assess.* 156: 141-157.
- 283 **Stevenson D.S.**, Young P.J., Naik V., Lamarque J.F., Shindell D.T., et al., 2012, “Tropospheric  
284 ozone changes, radiative forcing and attribution to emissions in the Atmospheric Chemistry and  
285 Climate Model Inter-comparison Project (ACCMIP)”. *Atmos. Chem. Phys. Discuss.* 12: 26047-  
286 26097.
- 287 **Thomson A.M.**, Calvin K.V., Smith S.J., Kyle G.P., Volke A., et al., 2011, “RCP4.5: A pathway  
288 for stabilization of radiative forcing by 2100”. *Clim. Change* 109: 77-94.
- 289 **Williams E.R.**, 2009, “The global electrical circuit: A review”. *Atmos. Res.*, 91: 140-152.
- 290 **Young P.J.**, Archibald A.T., Bowman K.W., Lamarque J.F., Naik V., et al., 2013, “Preindustrial to  
291 end 21st century projections of tropospheric ozone from the Atmospheric Chemistry and Climate  
292 Model Intercomparison Project (ACCMIP)”. *Atmos. Chem. Phys.* 13: 2063-2090.
- 293
